# Supplementary material
Source: publisher site journal article supplement (https://www.dovepress.com/article/259550)
Supplement: Supplementary file 1 [file get_supplementary_file.php]

Supplementary Material for “**Bio Framework Derived Facile MoO3-NiO-PdO-Pd Nanomaterial for Detoxification of Organic Pollutants** ”

**
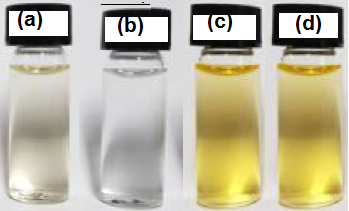
**

**Figure S-1:** Degradation of MO after 15 minutes **(a)** The methyl orange (MO) aqueous solution with the synthesized nanomaterial in the dark ambient conditions (b) MO with catalyst in the presences of solar light, (c) MO aqueous solution (without catalyst) under solar irradiation and (d) MO aqueous solution (without catalyst) under dark conditions.

**
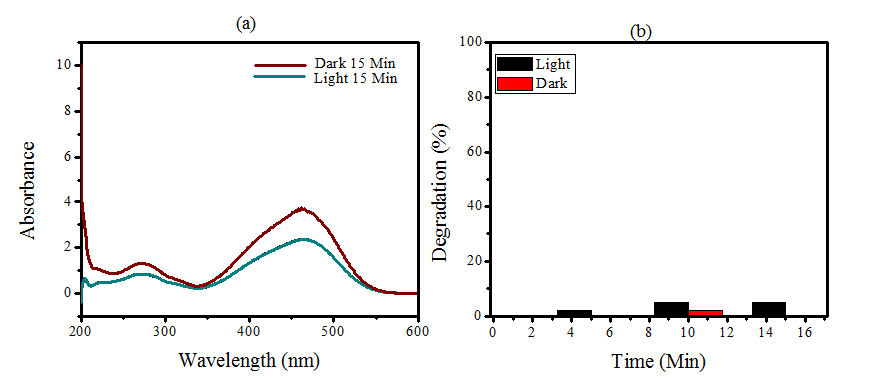
**

**Figure S-2:** (a) UV absorbance spectra of MO without catalyst in light in dark, and (b) Percentage degradation of MO without catalysts at different time intervals
